# Supplementary material for: The Additive Value of Radiomics Features Extracted from Baseline MR Images to the Barcelona Clinic Liver Cancer (BCLC) Staging System in Predicting Transplant-Free Survival in Patients with Hepatocellular Carcinoma: A Single-Center Retrospective Analysis
Source: MDPI journal article supplement (doi:10.3390/diagnostics13030552), 2023-02-02
Supplement: s1 [file s1]

## Supplementary material

### 2. Methods and Materials:

2.1. Grey level Discretization before extraction of radiomics features: To determine if radiomics features were dependent on the number of gray levels (Ng), radiomics features were extracted with resampled Ng values of 16, 32, 64, 128, and 256. Of these, 64 was the optimal value in our analysis and provided the best performance, and was used all of the respective analysis. A bin width of 25 HU was used to extract the features and symmetrical GLCM was enforced. The intensity range of the images were between 0-1200. More information regarding the exact parameters used in feature extraction could be found in the link below (an open source package for Matlab (1):

[https://www.mathworks.com/matlabcentral/fileexchange/51948-radiomics?s\\_tid=FX\\_rc1\\_behav](https://www.mathworks.com/matlabcentral/fileexchange/51948-radiomics?s_tid=FX_rc1_behav)). All code and data are available using GitHub directories. (<https://github.com/mvallieres/radiomics>)

2.2. The radiomics quality of the present article was 9 (25%). The complete report is attached as a separate PDF file.

Table S1. Radiomics features extracted, and their relative importance in the random forest classification.

| Feature Name              | Importance | Relative importance | Feature Name              | Importance | Relative importance |
|---------------------------|------------|---------------------|---------------------------|------------|---------------------|
| adcglzlmzsv               | 0.0264     | 1.0000              | veglrlmrlv                | 0.0026     | 0.0990              |
| adcglrlmlrhge             | 0.0171     | 0.6475              | adcglzlmzlge              | 0.0023     | 0.0856              |
| veglobalvariance          | 0.0115     | 0.4362              | adcglrlmsrhge             | 0.0022     | 0.0848              |
| adcglobalskewness         | 0.0114     | 0.4301              | adcglrlmlgre              | 0.0020     | 0.0744              |
| veglrlmhgre               | 0.0105     | 0.3964              | adcglrlmgln               | 0.0018     | 0.0699              |
| veglzlmglze               | 0.0104     | 0.3949              | veglzlmglze               | 0.0018     | 0.0664              |
| veglzlmzlge               | 0.0101     | 0.3820              | veglzlmzlzhge             | 0.0016     | 0.0619              |
| tumorprinicpalaxislength3 | 0.0089     | 0.3367              | bclccodecombine3group     | 0.0015     | 0.0550              |
| adcglzlmgln               | 0.0075     | 0.2825              | veglrlmrlrge              | 0.0013     | 0.0501              |
| adcglzlmhgze              | 0.0057     | 0.2173              | vengtdmcontrast           | 0.0013     | 0.0477              |
| adcglzlmzsv               | 0.0264     | 1.0000              | vengtdmstrength           | 0.0012     | 0.0472              |
| adcglrlmlrhge             | 0.0171     | 0.6475              | veglzlmglv                | 0.0012     | 0.0461              |
| veglobalvariance          | 0.0115     | 0.4362              | veglrlmlrhge              | 0.0011     | 0.0436              |
| veglzlmzslge              | 0.0056     | 0.2119              | veglrlmsre                | 0.0011     | 0.0404              |
| veglobalskewness          | 0.0049     | 0.1846              | adcngtdmbusyness          | 0.0008     | 0.0317              |
| veglrlmlgre               | 0.0047     | 0.1768              | adcglrlmrln               | 0.0008     | 0.0290              |
| veglrlmsrlge              | 0.0044     | 0.1684              | adcglrlmsre               | 0.0008     | 0.0286              |
| adcglzlmglv               | 0.0042     | 0.1590              | adcglzlmzlzhge            | 0.0007     | 0.0268              |
| veglzlmzsv                | 0.0032     | 0.1218              | adcngtdmcoarseness        | 0.0007     | 0.0247              |
| adcglrlmhgre              | 0.0028     | 0.1055              | veglcmautocorrelation     | 0.0006     | 0.0243              |
| veglcmenergy              | 0.0027     | 0.1041              | tumorsurfacearea          | 0.0003     | 0.0107              |
| veglrlmgln                | 0.0027     | 0.1020              | veglrlmgln                | 0.0002     | 0.0094              |
| tumorprinicpalaxislength1 | 0.0027     | 0.1007              | veglobalkurtosis          | 0.0002     | 0.0093              |
| adcglzlmshge              | 0.0006     | 0.0218              | adcngtdmstrength          | 0.0002     | 0.0092              |
| veglcmcontrast            | 0.0005     | 0.0208              | veglrlmlre                | 0.0002     | 0.0090              |
| vengtdmcomplexity         | 0.0005     | 0.0191              | tumorvolume               | 0.0002     | 0.0086              |
| adcglrlmrp                | 0.0004     | 0.0160              | veglrlmrln                | 0.0002     | 0.0075              |
| adcglrlmlrlge             | 0.0004     | 0.0150              | veglzlmhgze               | 0.0001     | 0.0047              |
| adcglzlmglze              | 0.0004     | 0.0141              | tumorprinicpalaxislength2 | 0.0001     | 0.0040              |
| veglzlmzvp                | 0.0004     | 0.0137              | adcglcmdissimilarity      | 0.0001     | 0.0034              |
| adcglrlmsrlge             | 0.0003     | 0.0130              | tumorsurfacearea          | 0.0003     | 0.0107              |
| adcglrlmrlv               | 0.0003     | 0.0129              | adcglcmenergy             | -0.0003    | -0.0096             |
| veglcmentropy             | 0.0003     | 0.0125              | veglcmhomogeneity         | -0.0003    | -0.0096             |
| veglrlmrp                 | 0.0001     | 0.0032              | adcglrlmlre               | -0.0004    | -0.0142             |
| veglrlmsrhge              | 0.0000     | 0.0012              | vengtdmbusyness           | -0.0004    | -0.0156             |
| adcglcmhomogeneity        | 0.0000     | -0.0005             | adcngtdmcontrast          | -0.0005    | -0.0190             |
| veglcmcorrelation         | -0.0001    | -0.0024             | adcglcmautocorrelation    | -0.0006    | -0.0215             |

|                     |         |         |                    |         |         |
|---------------------|---------|---------|--------------------|---------|---------|
| vegclmsumaverage    | -0.0001 | -0.0025 | adcglcmcorrelation | -0.0006 | -0.0221 |
| vegclmdissimilarity | -0.0001 | -0.0031 | adcglcmcontrast    | -0.0008 | -0.0305 |
| adcglrlmglv         | -0.0001 | -0.0037 | adcglcmentropy     | -0.0008 | -0.0308 |
| vengtdmcoarseness   | -0.0002 | -0.0069 | veglzlmzsn         | -0.0008 | -0.0314 |
| adcglzlmzp          | -0.0010 | -0.0373 | veglzlmsze         | -0.0009 | -0.0325 |
| adcglcmvariance     | -0.0011 | -0.0401 | veglzlmzhge        | -0.0009 | -0.0335 |
| adcglzlmigze        | -0.0011 | -0.0415 | veglzlmgln         | -0.0014 | -0.0547 |
| adcglzlmsze         | -0.0014 | -0.0524 | adcglcmsumaverage  | -0.0015 | -0.0550 |
| adcngtdmcomplexity  | -0.0014 | -0.0531 | adcglzlmzsn        | -0.0022 | -0.0826 |
| adcglzlmzp          | -0.0010 | -0.0373 | adcglobalvariance  | -0.0024 | -0.0912 |
| vegclmvariance      | -0.0031 | -0.1161 | adcglzlmzlgze      | -0.0027 | -0.1036 |
| adcglobalkurtosis   | -0.0035 | -0.1335 | tumorsolidity      | -0.0043 | -0.1619 |

Table S2. Classification of radiomics features extracted in the present article.

| <b>Feature class</b>                                    | <b>Feature Name</b>                                                                                                                                                                                                                                                                                                                                                                                                                                     |
|---------------------------------------------------------|---------------------------------------------------------------------------------------------------------------------------------------------------------------------------------------------------------------------------------------------------------------------------------------------------------------------------------------------------------------------------------------------------------------------------------------------------------|
| <b>Gray Level Run Length Matrix Features (GLRLM)</b>    | Short-run emphasis (SRE), Long-run Emphasis (LRE), Gray-level non-uniformity (GLN), Run-length non-uniformity (RLN), Run Percentage (RP), Low Gray-level Run Emphasis (LGRE), High Gray-level Run Emphasis (HGRE), Short Run Low Gray-level Emphasis (SRLGE), Short Run High Gray-level Emphasis (SRHGE), Long Run Low Gray-level Emphasis (LRLGE), Long Run High Gray-level Emphasis (LRHGE), Gray-level Variance (GLV), and Run Length Variance (RLV) |
| <b>Gray Level Size Zone Matrix Features (GLSZM)</b>     | Small Zone Emphasis (SZE), Large Zone Emphasis (LZE), Gray-level non-uniformity (GLN), Zone Size non-uniformity (ZSN), Zone percentage (ZP), Low Gray-level Zone Emphasis (LGZE), High Gray-level Zone Emphasis (HGZE), Small Zone Low Gray-level Emphasis (SZHGE), Large Zone Low Gray-level Emphasis (LZLGE), Large Zone High Gray-level Emphasis (LZHGE), Gray-level Variance (GLV), and Zone Size Variance (RLV)                                    |
| <b>Gray Level Co-occurrence Matrix Features (GLCM)</b>  | Contrast, Correlation, Energy, Variance, Sum average, Dissimilarity, Autocorrelation, Entropy, and Homogeneity                                                                                                                                                                                                                                                                                                                                          |
| <b>Global Features</b>                                  | Mean, Maximum, and Minimum (for both ADC and VE), Tumor Solidity, Surface Area, and Volume                                                                                                                                                                                                                                                                                                                                                              |
| <b>Histogram-based Features</b>                         | Variance, Skewness, and Kurtosis                                                                                                                                                                                                                                                                                                                                                                                                                        |
| <b>Neighborhood Gray-tone Difference Matrix (NGTDM)</b> | Mean, Variance, Kurtosis, Strength, and Skewness                                                                                                                                                                                                                                                                                                                                                                                                        |

Figure S1. The relation between number of variables included in the random forest model and the prediction error rate. As seen in the image the optimal point was achieved with 3 variables and inclusion of further variables did not significantly contribute to the model.

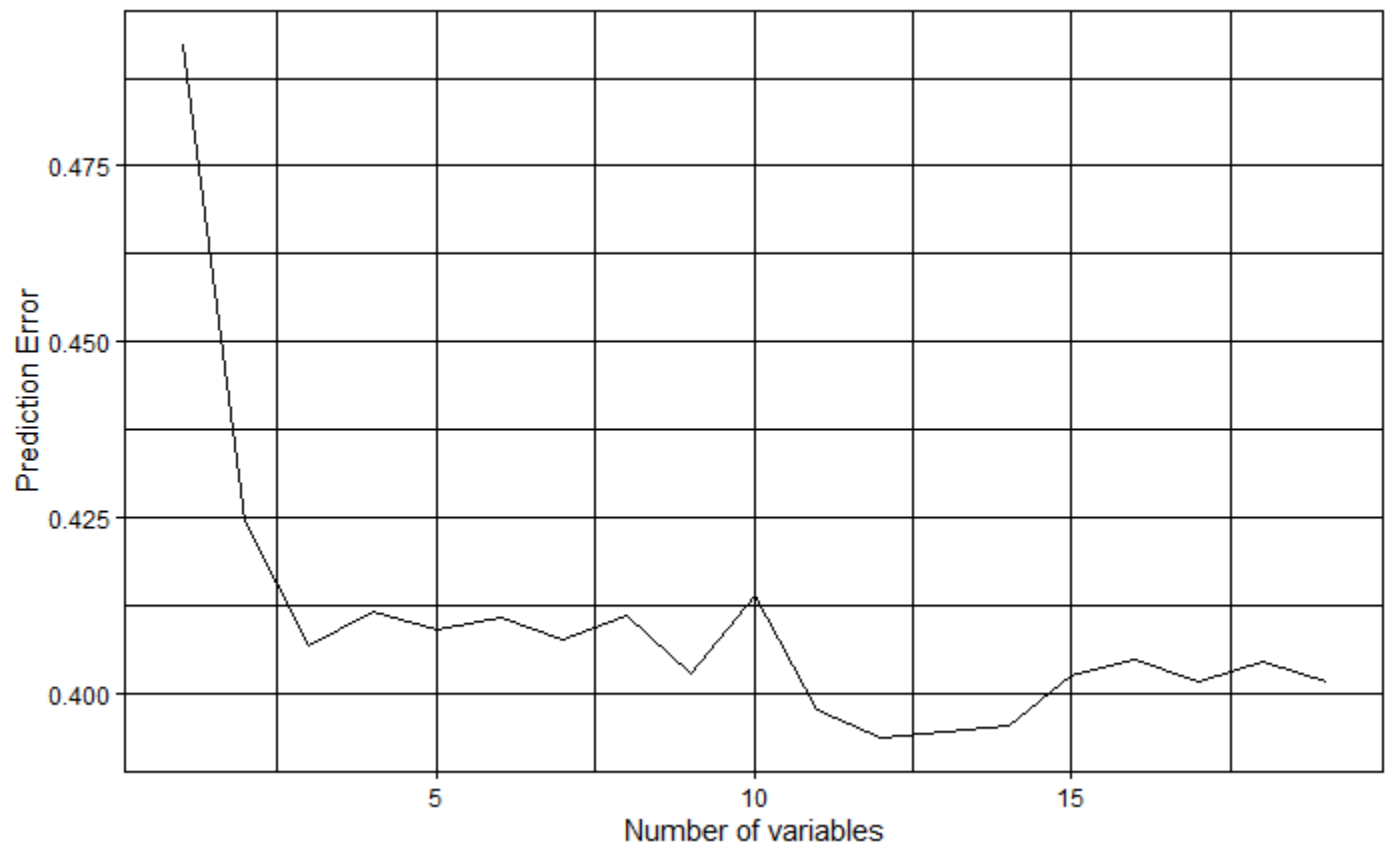

Figure S2. Kaplan Meier curve demonstrates the transplant-free survival of patients based on BCLC clustering alone.

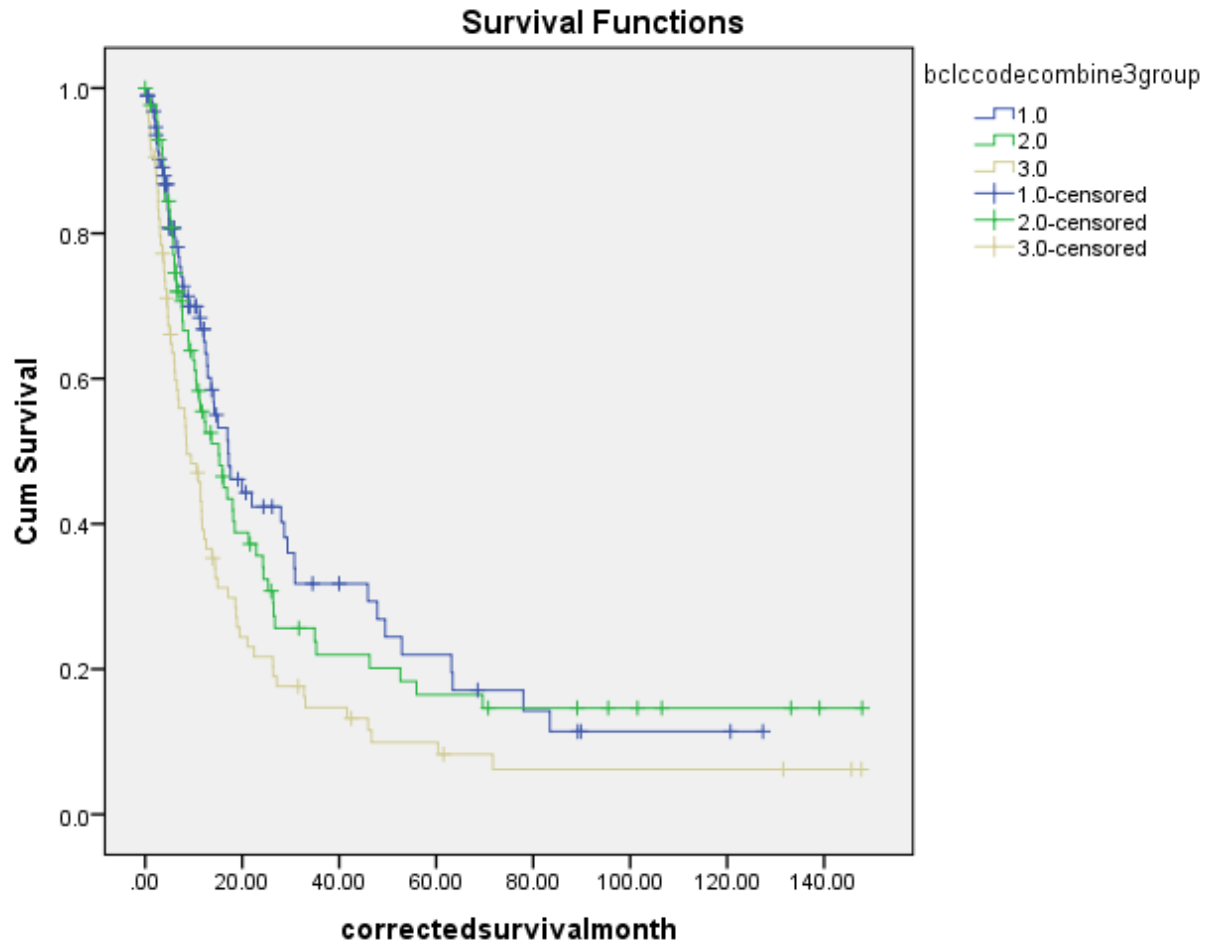

#### References:

1. Vallières M, Freeman CR, Skamene SR, El Naqa IJPiM, Biology. A radiomics model from joint FDG-PET and MRI texture features for the prediction of lung metastases in soft-tissue sarcomas of the extremities. 2015;60(14):5471.
